# Supplementary figures and images for: Map2k1andMap2k2genes contribute to the normal development of syncytiotrophoblasts during placentation
Source: Oxford University Press journal article supplement (doi:10.1242/dev.031872), 2009-03-20

**A**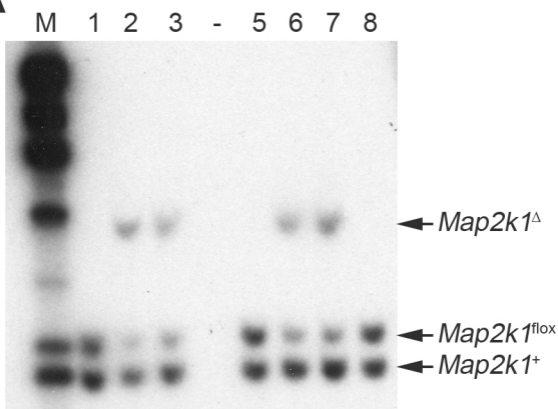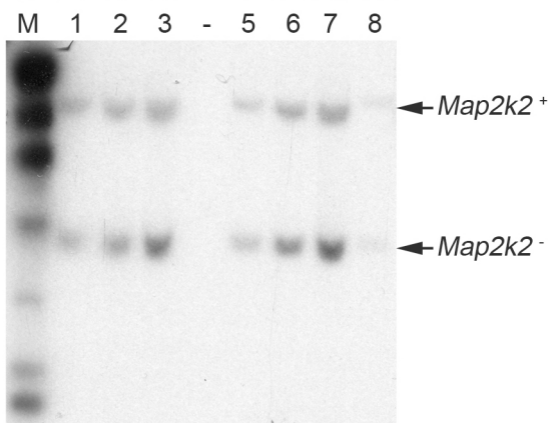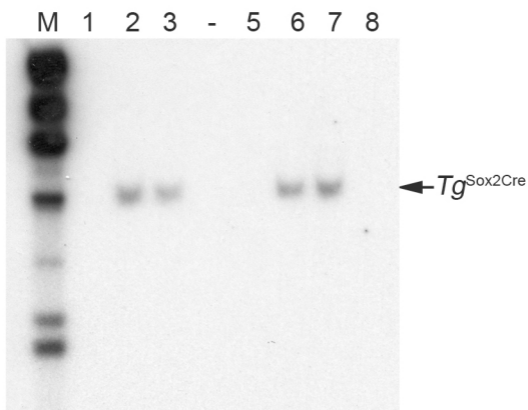**B**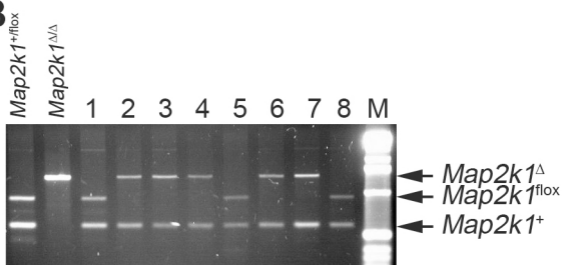

Supplement: dev031872-sup-031872-figs2.pdf [file dev031872-sup-031872-figs2.pdf]

*Map2k1*<sup>+/+</sup>

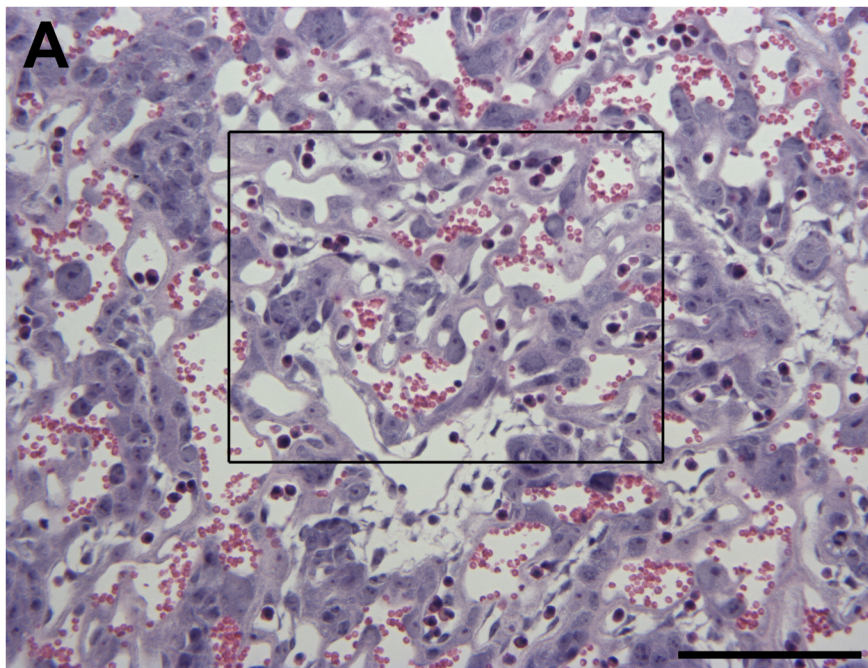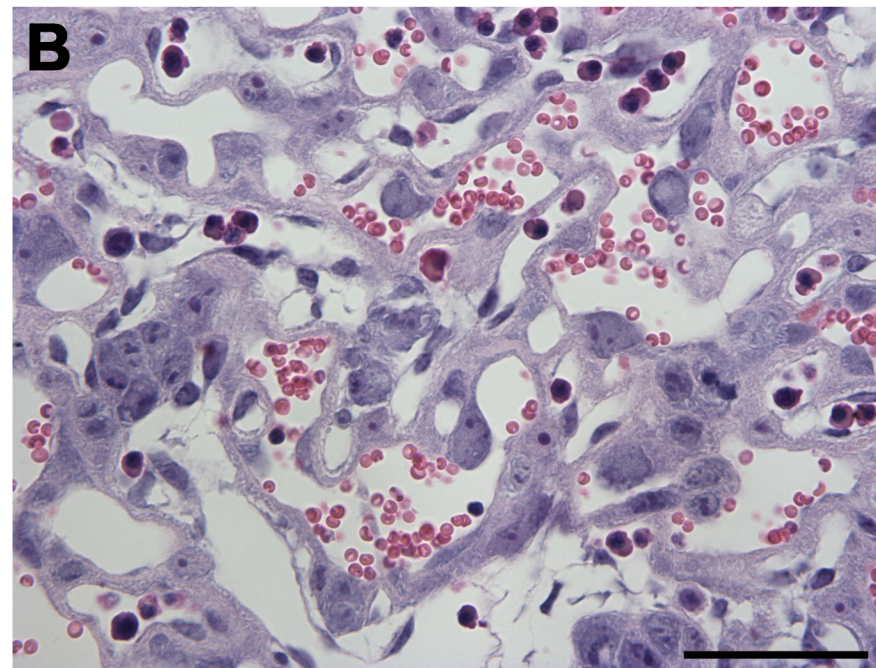

*Map2k1*<sup>+/-</sup>

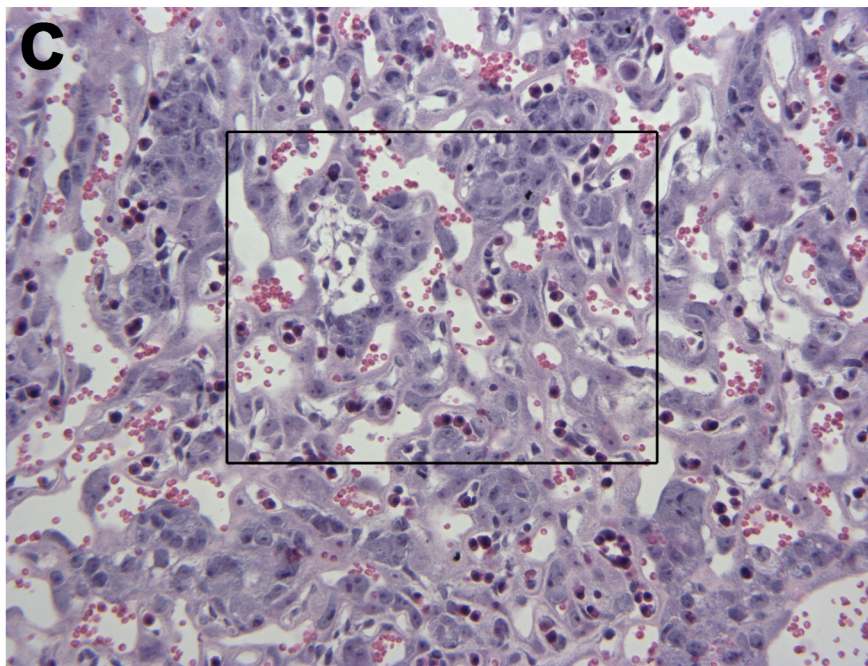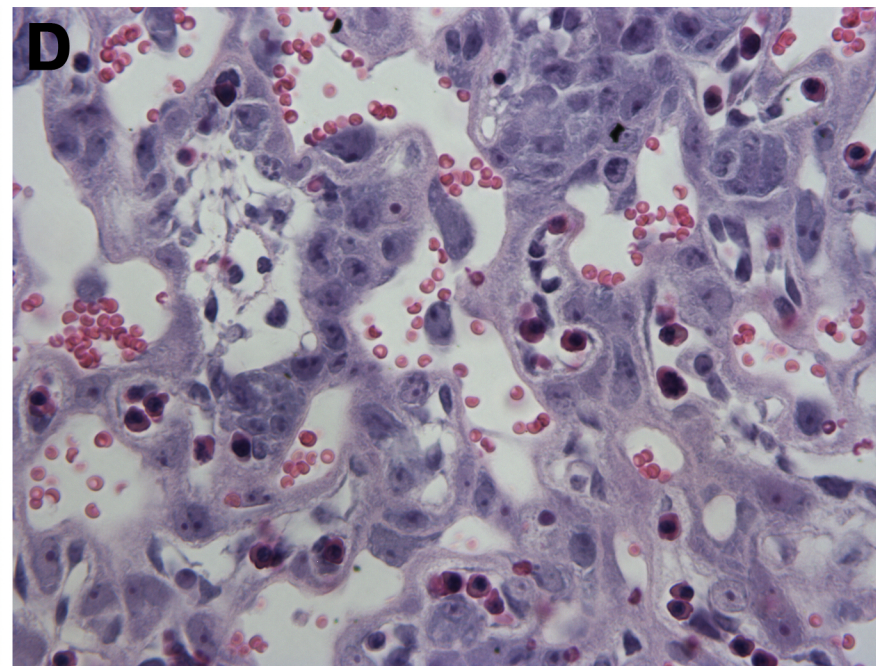

Supplement: dev031872-sup-031872-figs3.pdf [file dev031872-sup-031872-figs3.pdf]
